# Supplementary material for: Inhibiting the SUMO Pathway Represses the Cancer Stem Cell Population in Breast and Colorectal Carcinomas
Source: PubMed Central journal article supplement — Stem Cell Reports. 2016 Dec 1;7(6):1140–51. doi: 10.1016/j.stemcr.2016.11.001 (PMC5161532; doi:10.1016/j.stemcr.2016.11.001), 2016-12-01
Supplement: mmc1.pdf [file mmc1.pdf]

**Stem Cell Reports, Volume 7**

**Supplemental Information**

**Inhibiting the SUMO Pathway Represses the Cancer Stem Cell Population in Breast and Colorectal Carcinomas**

**Maria V. Bogachek, Jung M. Park, James P. De Andrade, Allison W. Lorenzen, Mikhail V. Kulak, Jeffrey R. White, Vivian W. Gu, Vincent T. Wu, and Ronald J. Weigel**

## SUPPLEMENTAL DATA

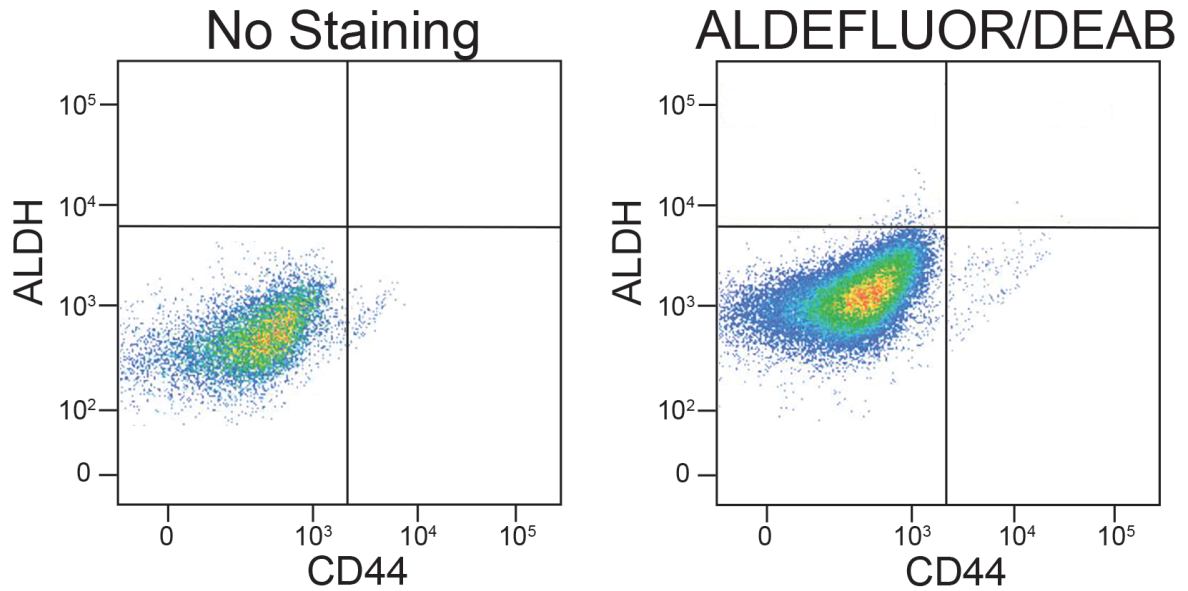

**Supplemental Figure 1. Controls for FACS Analysis in Figure 2.** Shown are the negative controls for FACS analysis for data provided in Figure 2 with tumor cells isolated from xenografts. No staining control (left panel) is flow with no antibody or ALDEFLUOR. ALDEFLUOR/DEAB (right panel) is flow performed with no antibody and with ALDEFLUOR + DEAB. These data were used to establish negative gating.

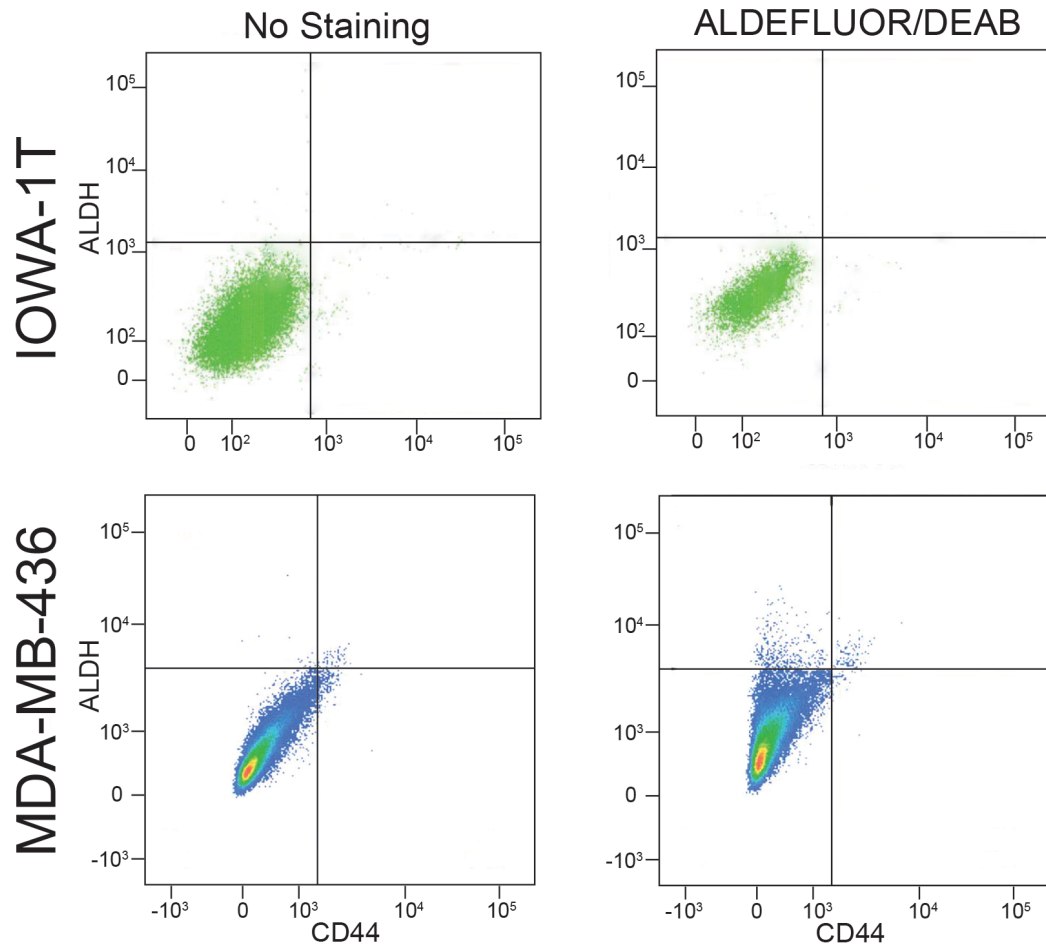

**Supplemental Figure 2. Controls for FACS Analysis in Figure 3.** Shown are the negative controls for FACS analysis for data provided in Figure 3 for FACS analysis of IOWA-1T and MDA-MB-436 cells. No staining control (left panels) is flow with no antibody or ALDEFLUOR. ALDEFLUOR/DEAB (right panels) is flow performed with no antibody and with ALDEFLUOR + DEAB. These data were used to establish negative gating.

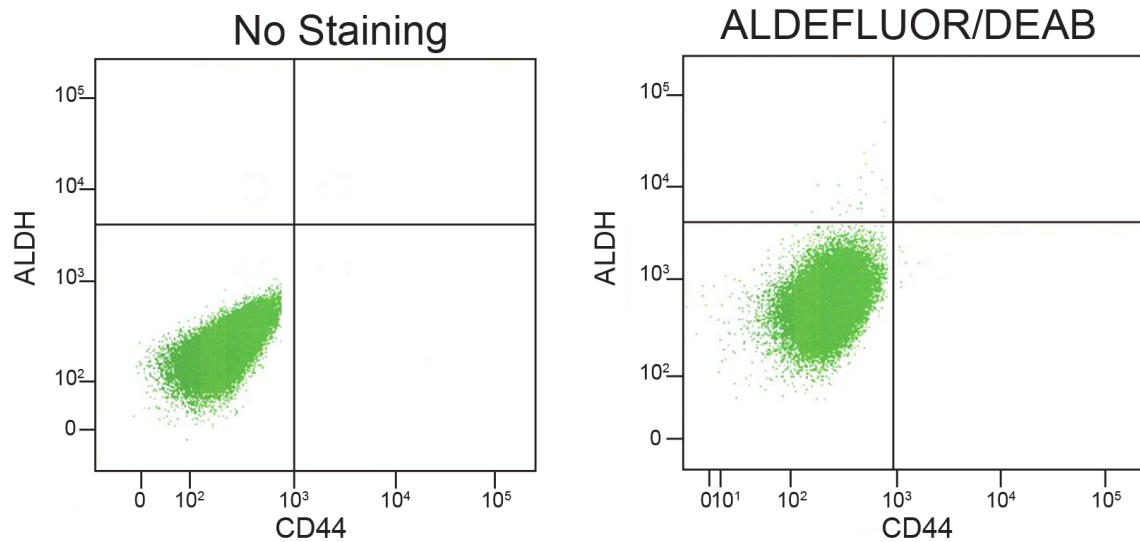

**Supplemental Figure 3. Controls for FACS Analysis in Figure 6.** Shown are the negative controls for FACS analysis for data provided in Figure 6 showing analysis of HCT-116 cells. No staining control (left panel) is flow with no antibody or ALDEFLUOR. ALDEFLUOR/DEAB (right panel) is flow performed with no antibody and with ALDEFLUOR + DEAB. These data were used to establish negative gating.

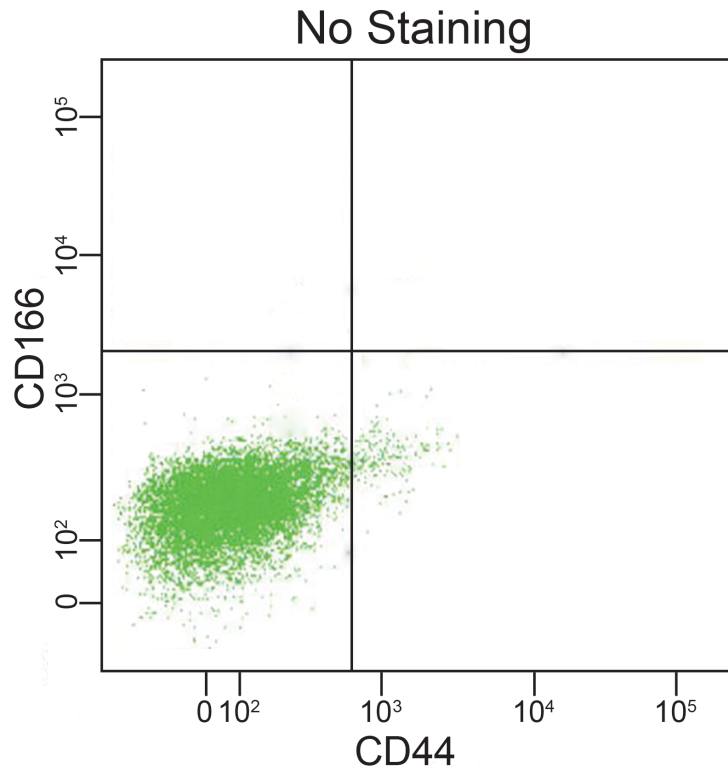

**Supplemental Figure 4. Control for FACS Analysis in Figure 7.** Shown is the negative control for FACS analysis for data provided in Figure 7 showing analysis of primary colorectal cancer cells. No staining control was flow performed with no antibodies (neither CD44 or CD116). These data were used to establish negative gating.
